# Supplementary material
Source: PubMed Central journal article supplement (PMC3763515)

**Supporting Information: The mobility of two kinase domains in the *Escherichia coli* chemoreceptor array varies with signaling state**

Ariane Briegel<sup>1</sup>, Peter Ames<sup>2</sup>, James C. Gumbart<sup>3</sup>, Catherine M. Oikonomou<sup>4</sup>, John S. Parkinson<sup>2</sup> and Grant J. Jensen<sup>1,4\*</sup>

**Table S1 Strains used in the study**

| strain | relevant genotype <sup>a</sup>                                     | references          |                            |
|--------|--------------------------------------------------------------------|---------------------|----------------------------|
|        |                                                                    | <i>tsr</i>          | <i>cheA</i>                |
| UU2564 | <i>tsr-E304Q/E493Q [QQQQ] cheA<sup>+</sup> Δ(tar-cheB)4346</i>     | this work           | wild-type                  |
| UU2567 | <i>Δ(tar-cheZ)4211 (tsr)Δ5547</i>                                  | this work           |                            |
| UU2618 | <i>tsr<sup>+</sup> [QEQE] cheA<sup>+</sup> Δ(tar-cheB)4346</i>     | wild-type           | wild-type                  |
| UU2619 | <i>tsr-Q297E/Q311E [EEEE] cheA<sup>+</sup> Δ(tar-cheB)4346</i>     | this work           | wild-type                  |
| UU2735 | <i>tsr-P221D [QEQE] cheA<sup>+</sup> Δ(tar-cheB)4346</i>           | (Zhou et al., 2009) | wild-type                  |
| UU2736 | <i>tsr-G235E [QEQE] cheA<sup>+</sup> Δ(tar-cheB)4346</i>           | (Ames et al., 2008) | wild-type                  |
| UU2737 | <i>tsr-I241E [QEQE] cheA<sup>+</sup> Δ(tar-cheB)4346</i>           | (Ames et al., 2008) | wild-type                  |
| UU2744 | <i>tsr-A413T [QEQE] cheA<sup>+</sup> Δ(tar-cheB)4346</i>           | this work           | wild-type                  |
| UU2801 | <i>tsr-P221D [QEQE] (cheA)Δ7-247 [Δ(P1-P2)] Δ(tar-cheB)4346</i>    | (Zhou et al., 2009) | (Garzon & Parkinson, 1996) |
| UU2803 | <i>tsr-A413T [QEQE] (cheA)Δ7-247 [Δ(P1-P2)] Δ(tar-cheB)4346</i>    | this work           | (Garzon & Parkinson, 1996) |
| UU2804 | <i>tsr-A413T [QEQE] (cheA)Δ150-247ΩPA1 [Δ(P2)] Δ(tar-cheB)4346</i> | this work           | (Jahreis et al., 2004)     |

<sup>a</sup> All strains carried the following markers in common: (*aer*)Δ1 (*trg*)Δ4543 *yjgG::Gm*.

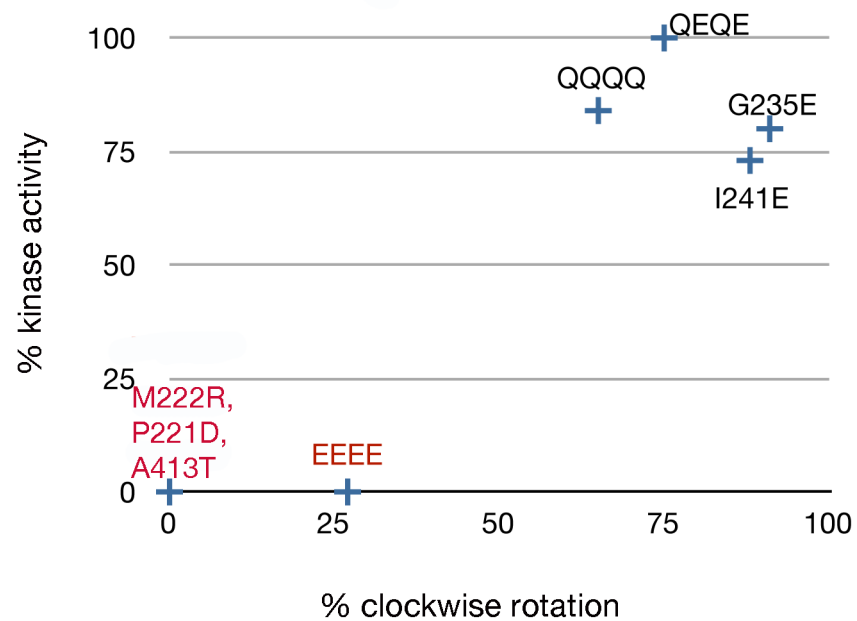

**Fig. S1 Correlation of *in vivo* kinase activity and direction of flagellar rotation in mutant receptor strains.**

The plot shows the kinase activities and flagellar rotation behaviors of the various mutant receptor strains listed in Tables 1 and S1. The four receptor mutants with red labels were classified as kinase-inactive; the four with black labels were classified as kinase-active.

**Fig. S2 Representative array patches from the receptor mutants used in this study.**

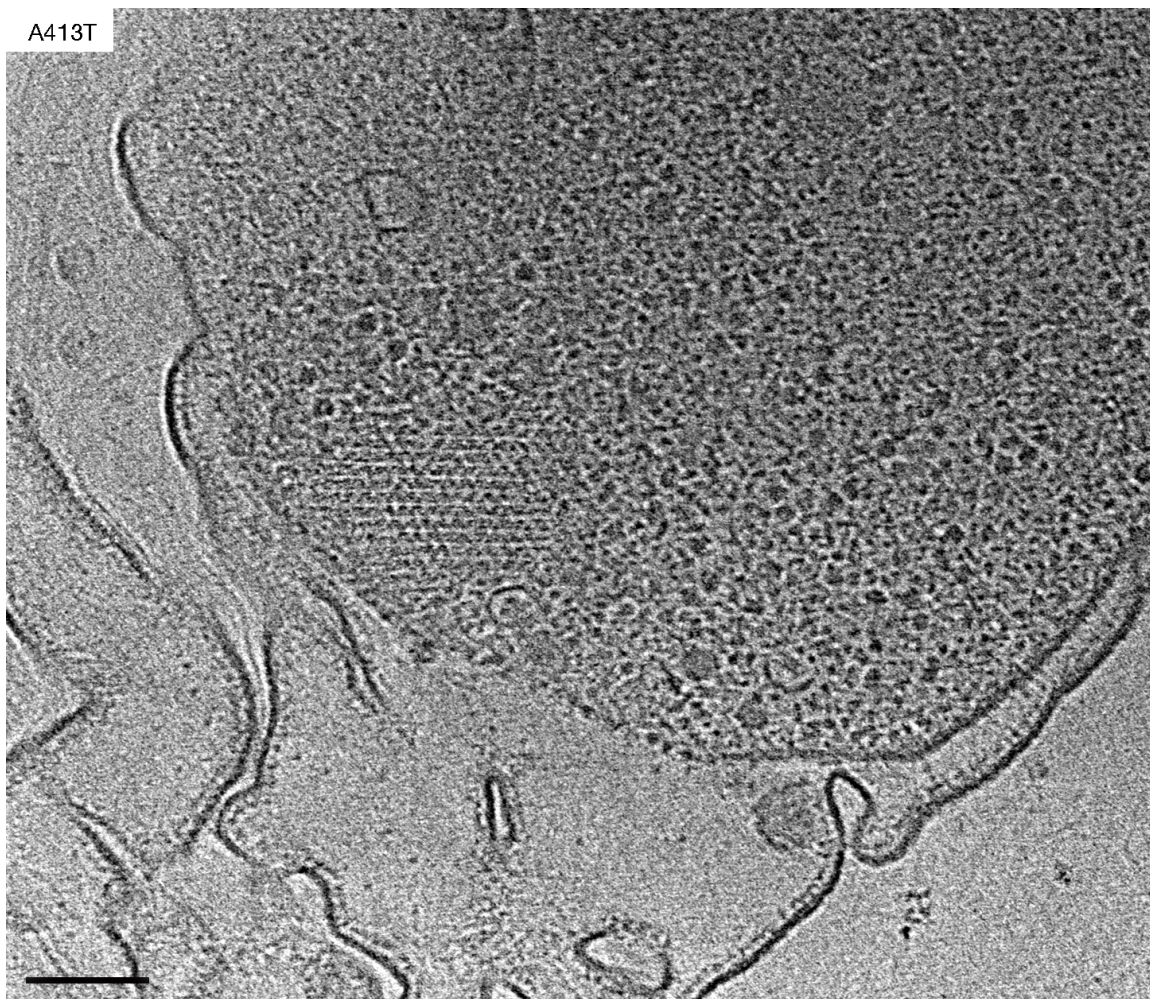

EEEE

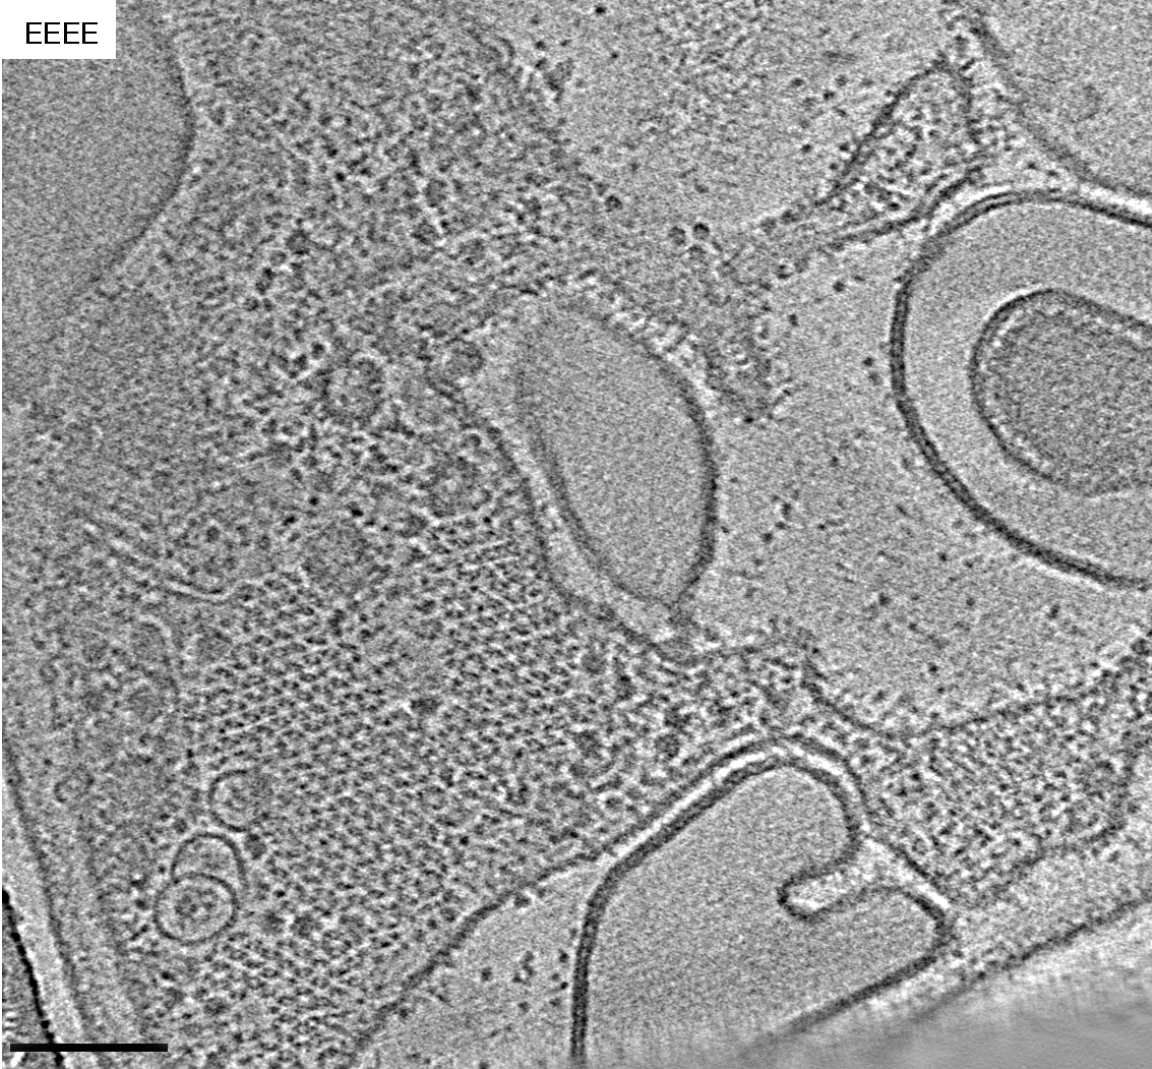

P221D

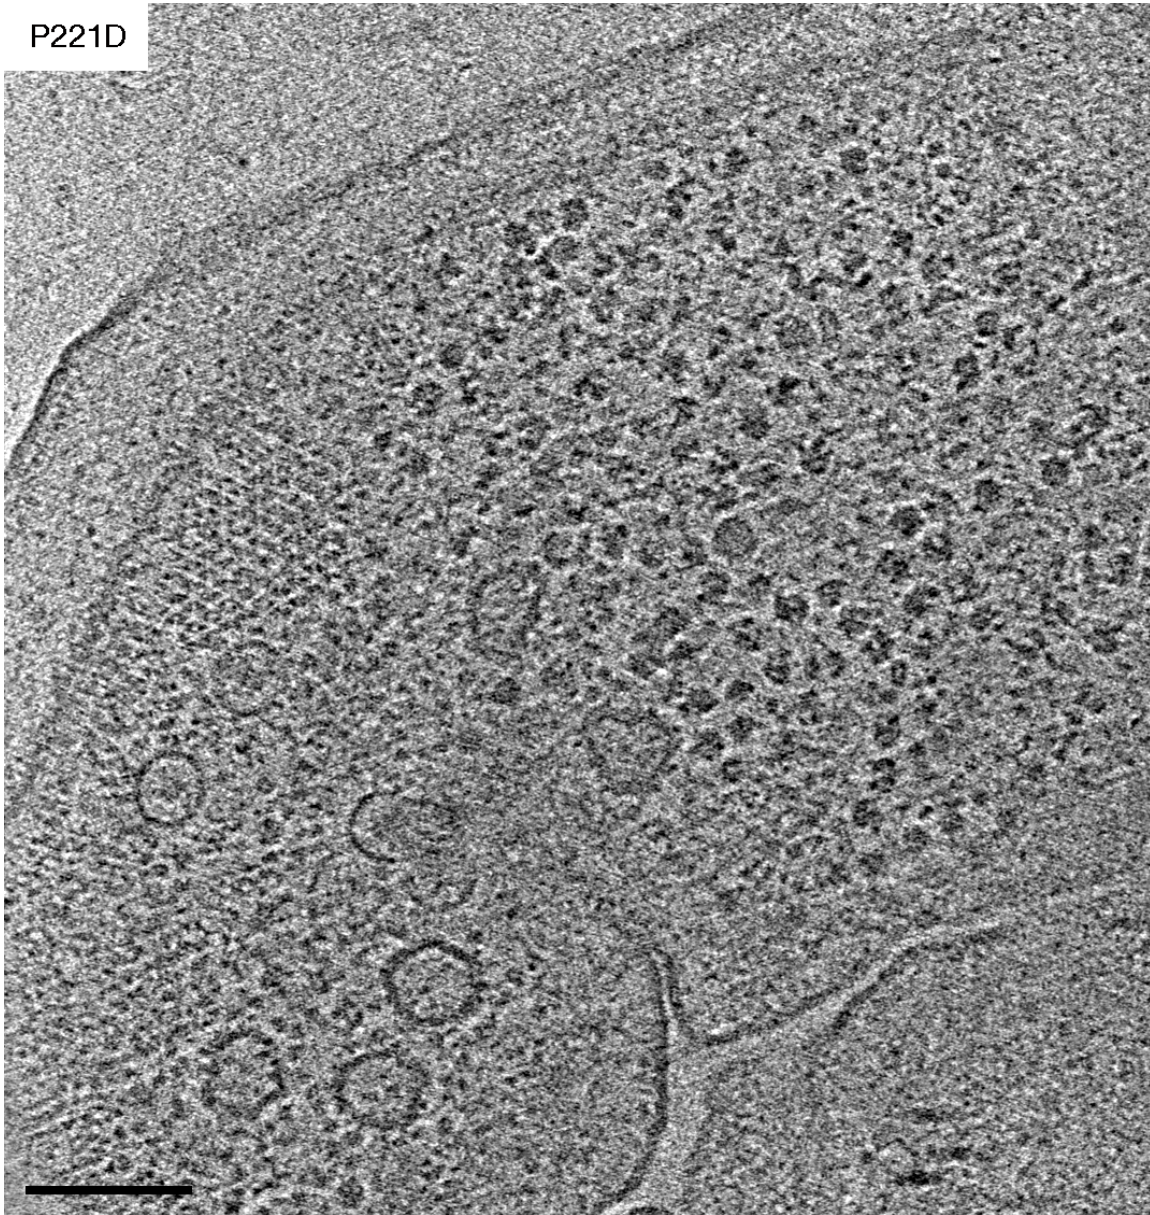

M222R

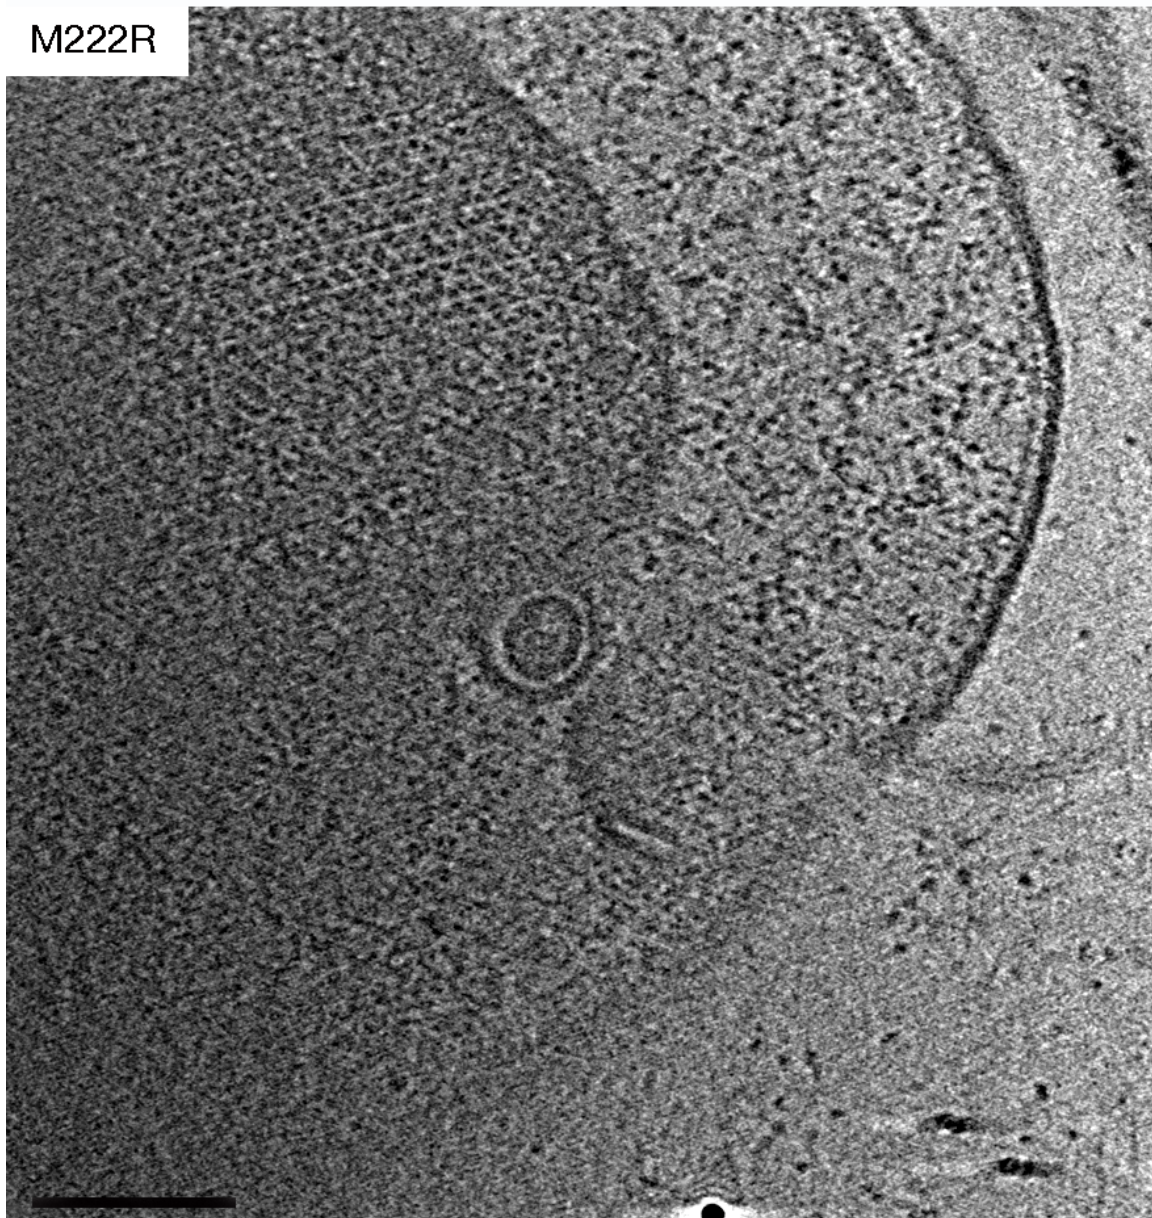

QQQQ

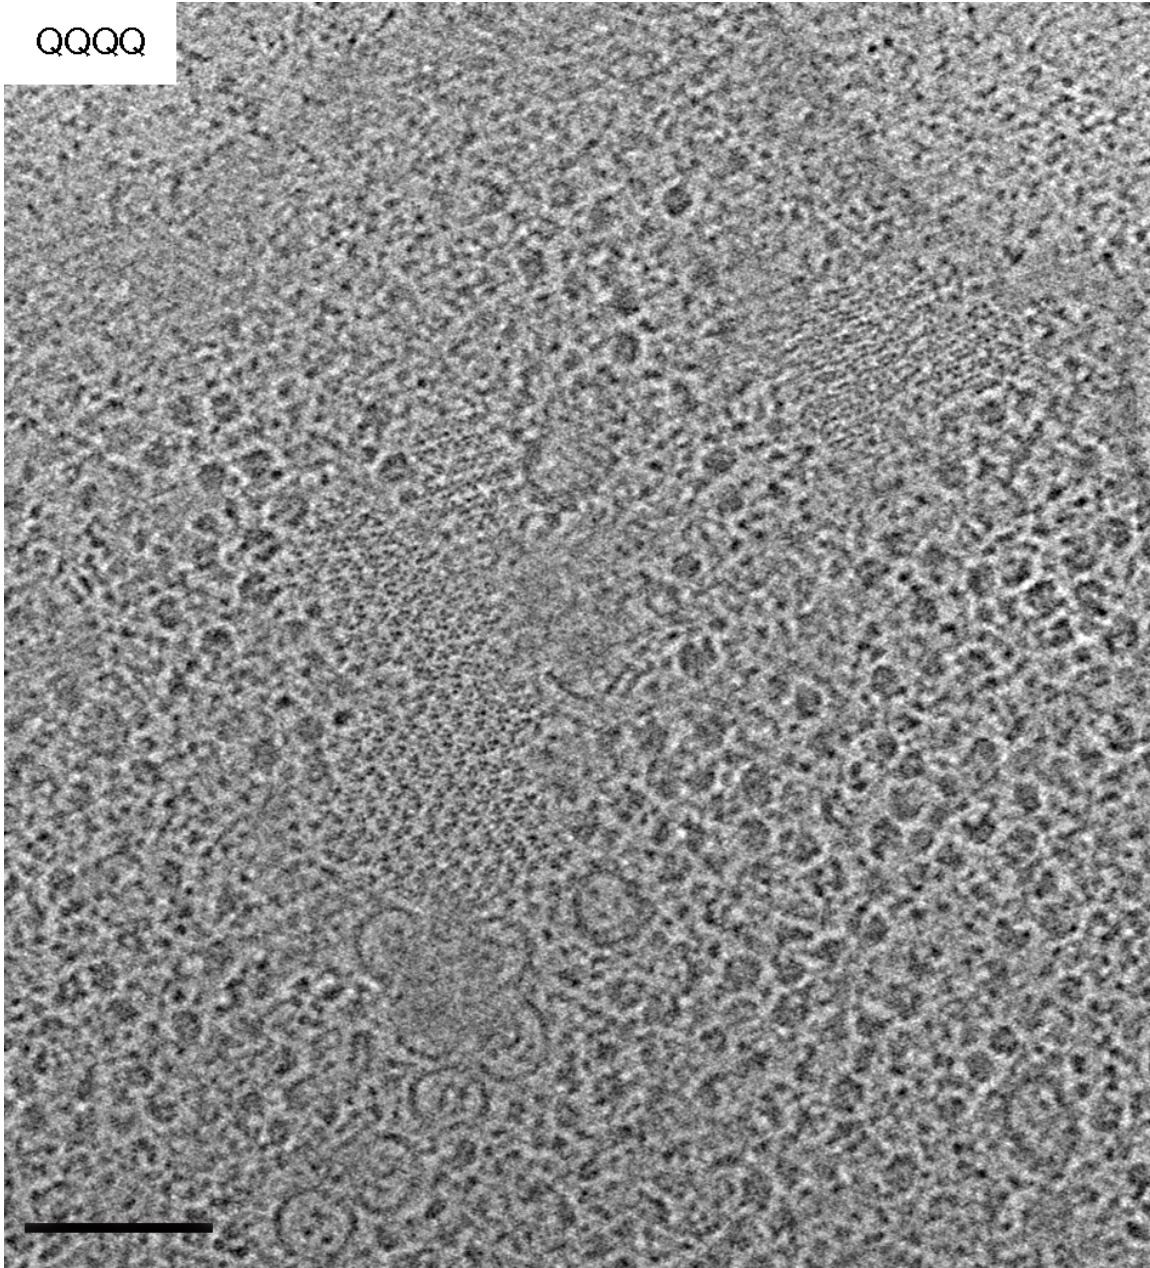



QEQE

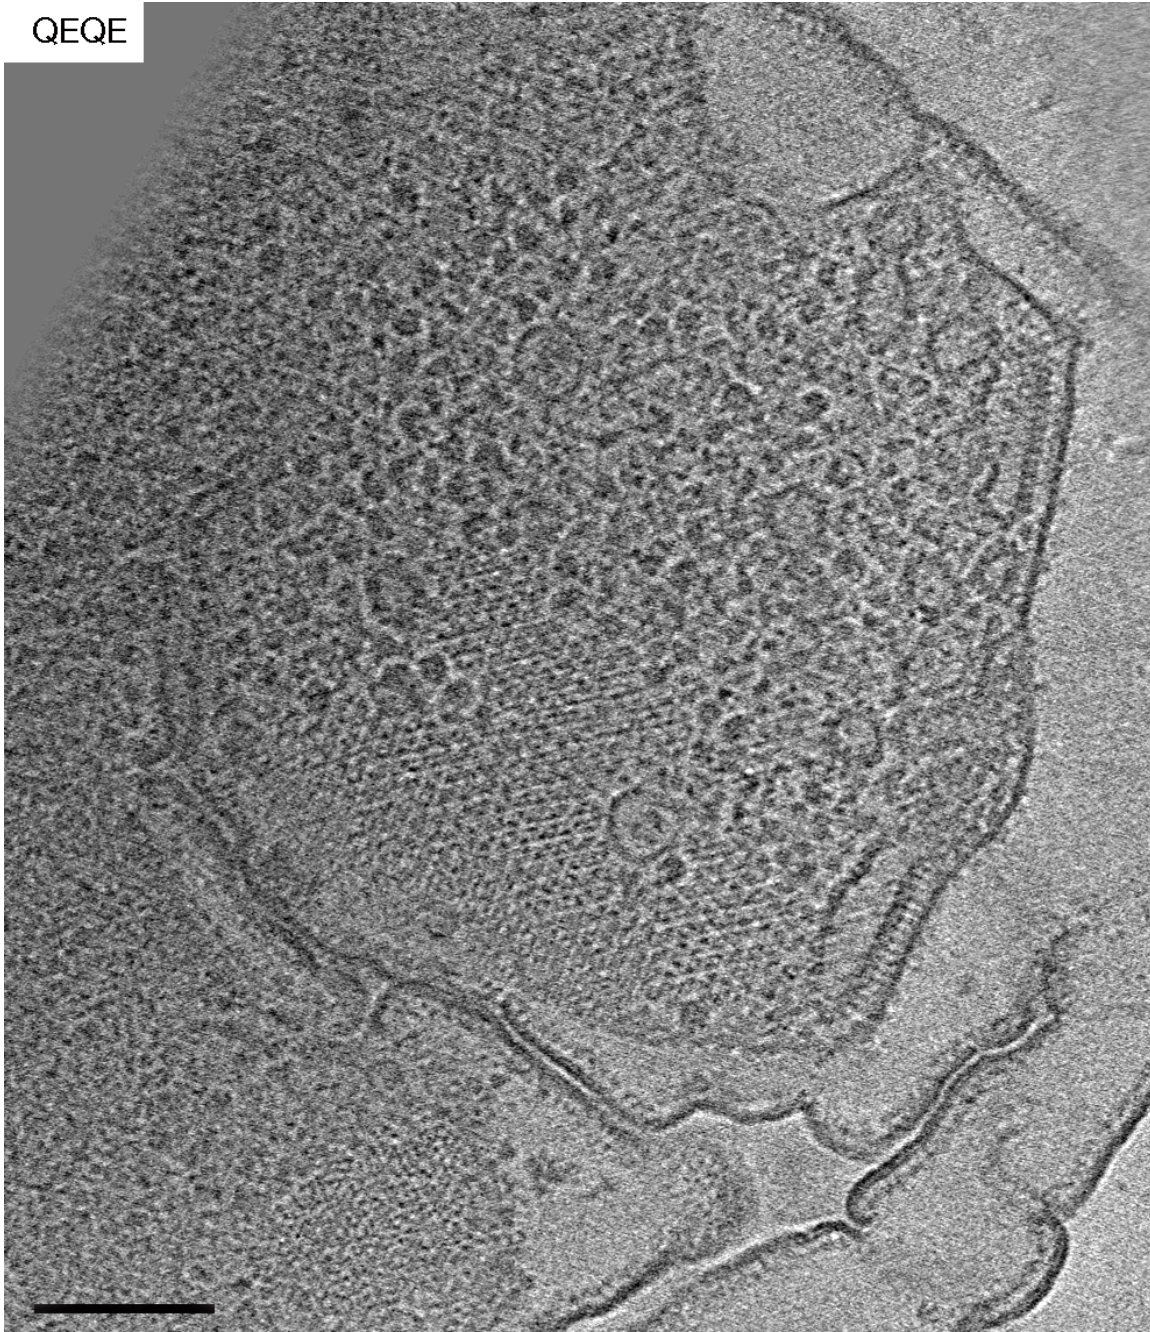

G235E

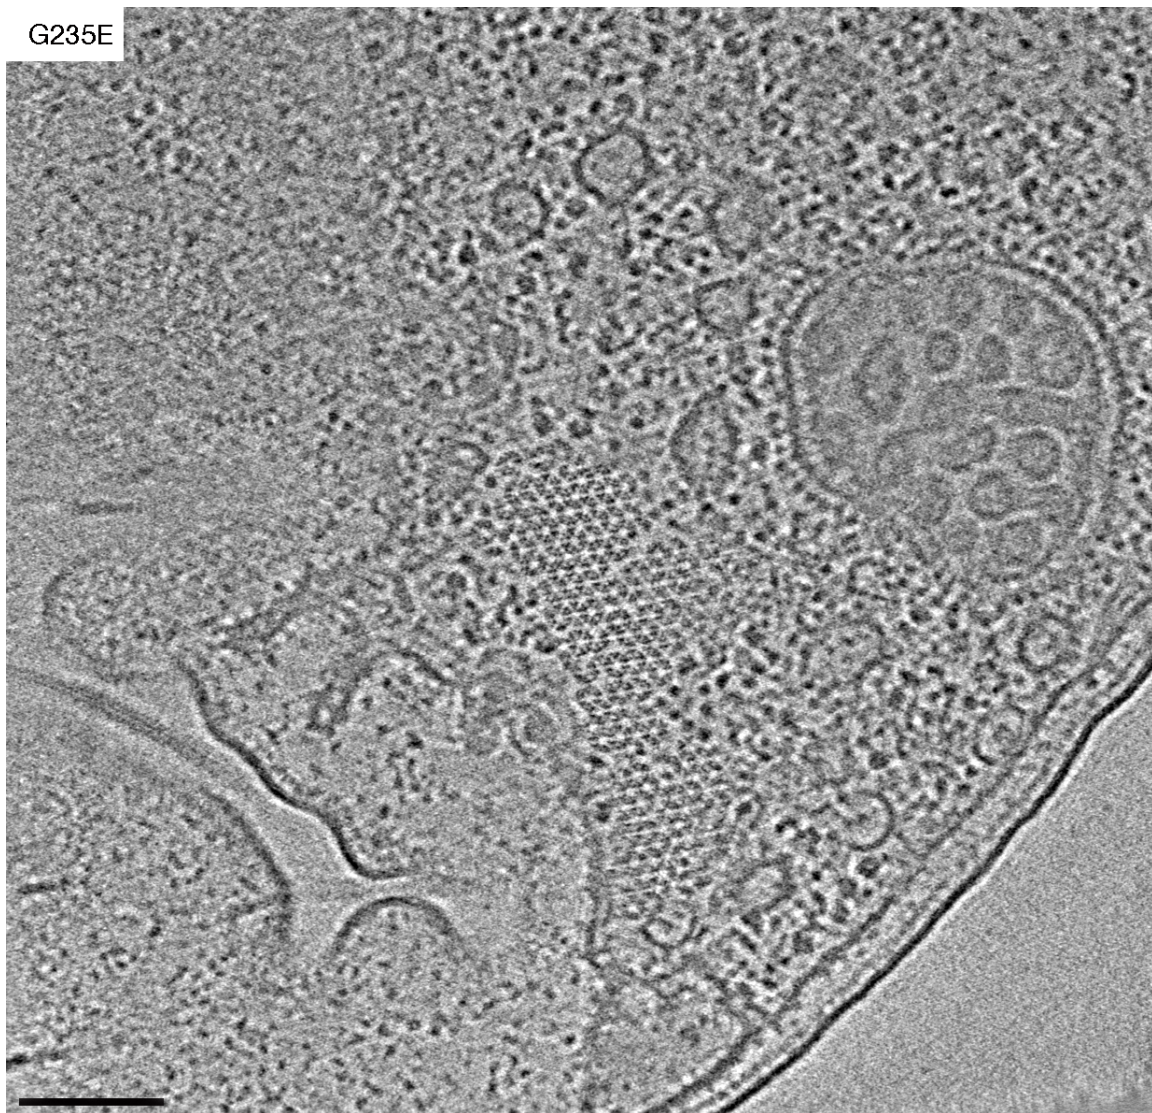

I241E

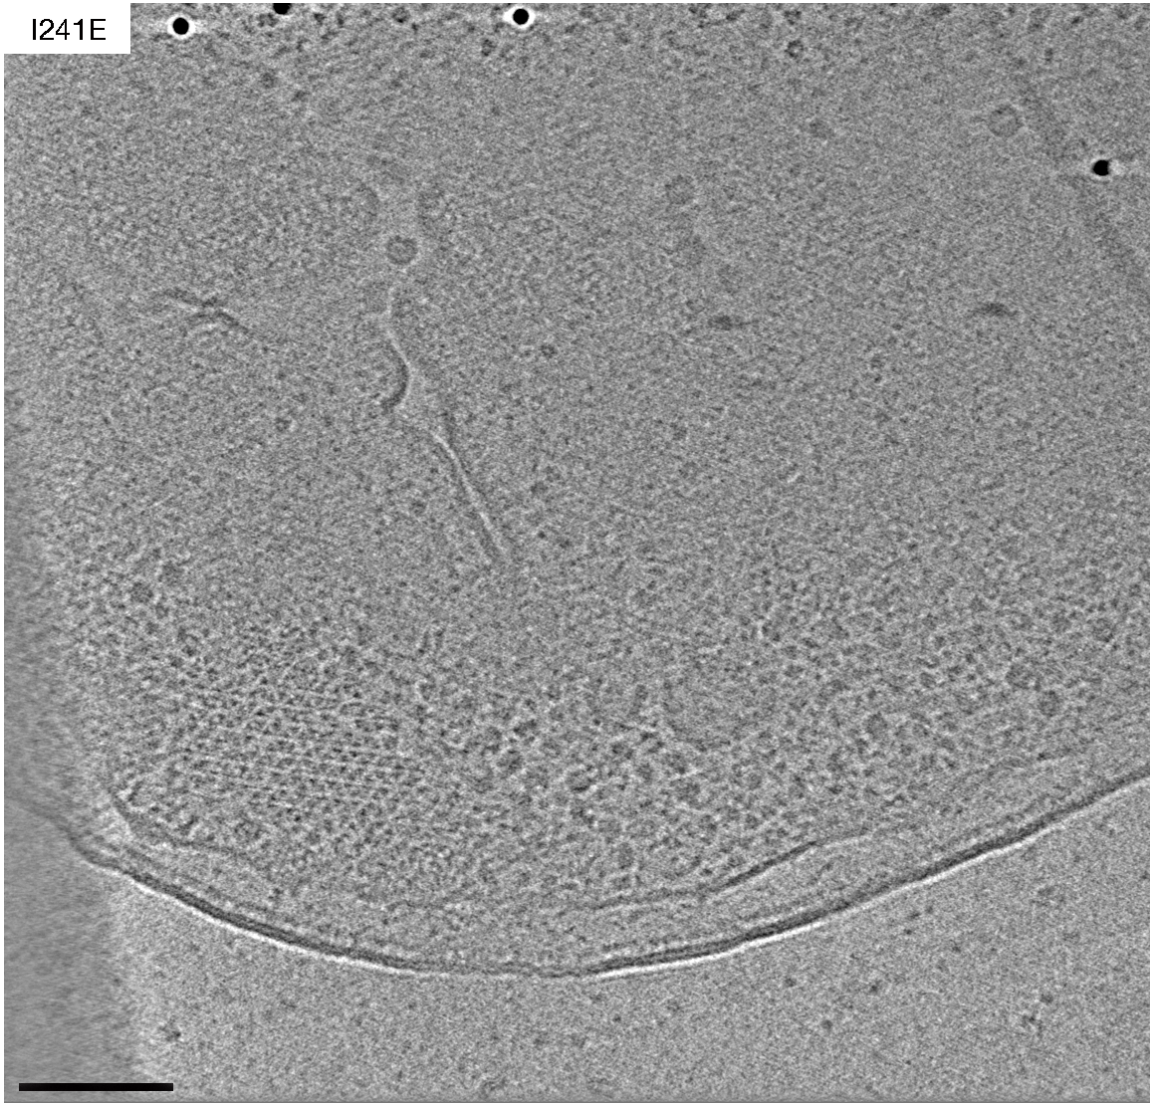

Supplement: NIHMS502238-supplement-Supp_Table_S1___Fig_S1-S2.pdf [file NIHMS502238-supplement-Supp_Table_S1___Fig_S1-S2.pdf]
